# Supplementary material
Source: PubMed Central journal article supplement (PMC2910114)

## SUPPLEMENTARY INFORMATION

**FIGURE 1S.** Initial rate for the ADA (bovine spleen) catalyzed deamination of *South-*dAdo (▲) at 60  $\mu$ M and 25  $^{\circ}$ C.

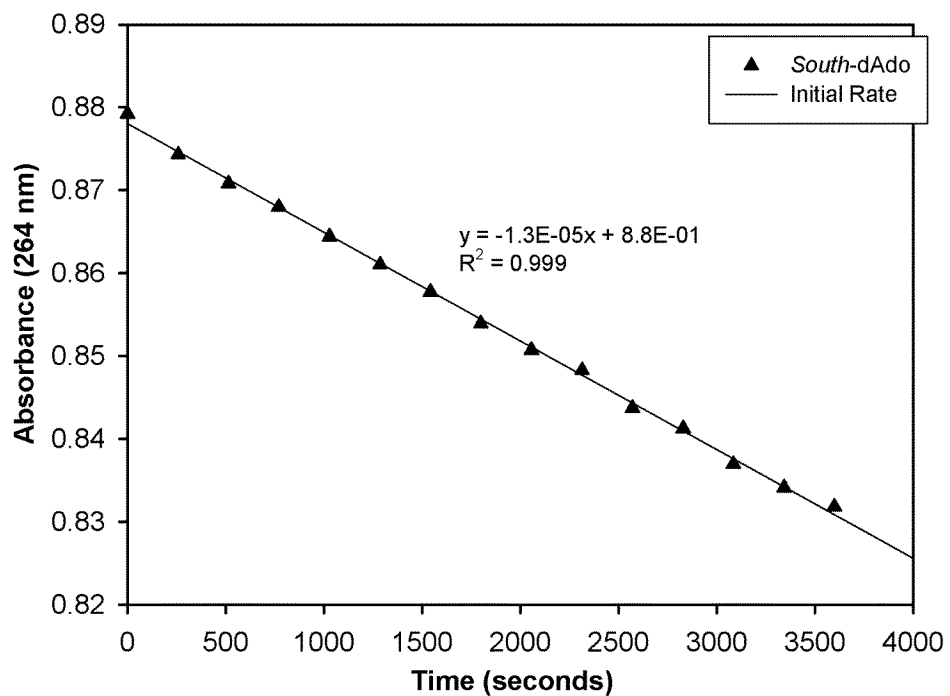

**FIGURE 2S.** Initial rate for the ADA (bovine spleen) catalyzed deamination of *North-dAdo* (◆) at 60  $\mu$ M and 25  $^{\circ}$ C.

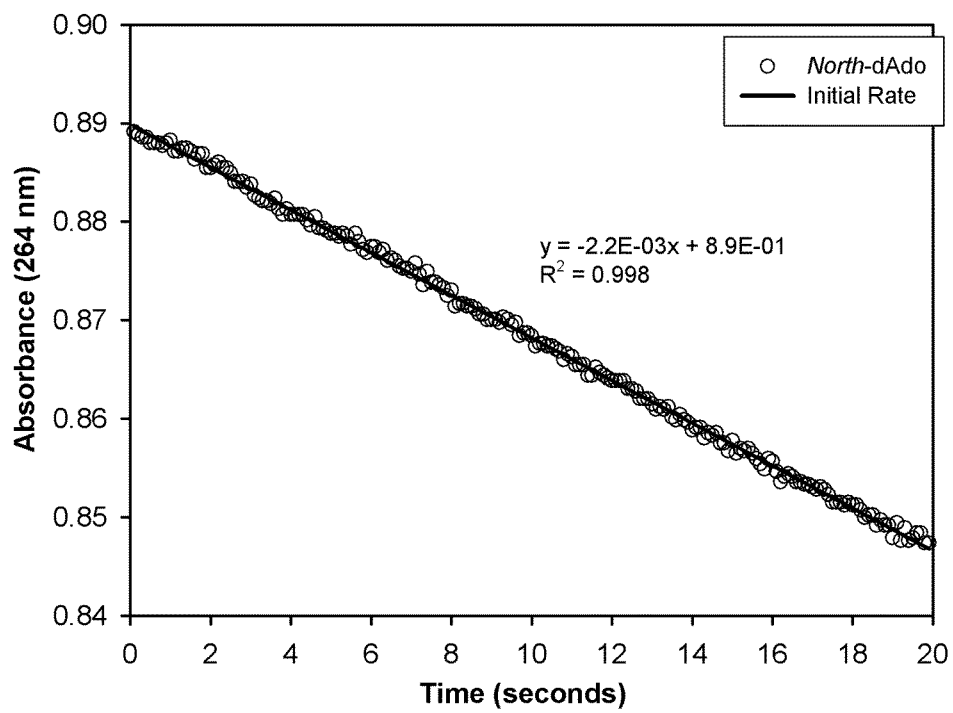

**FIGURE 3S.** UV spectrum for 2'-deoxycytidine (dashed line) and *South*-dCyd (solid line). The UV spectrum of 2'-deoxycytidine, shifted by 4 nm is included for reference (dotted line).

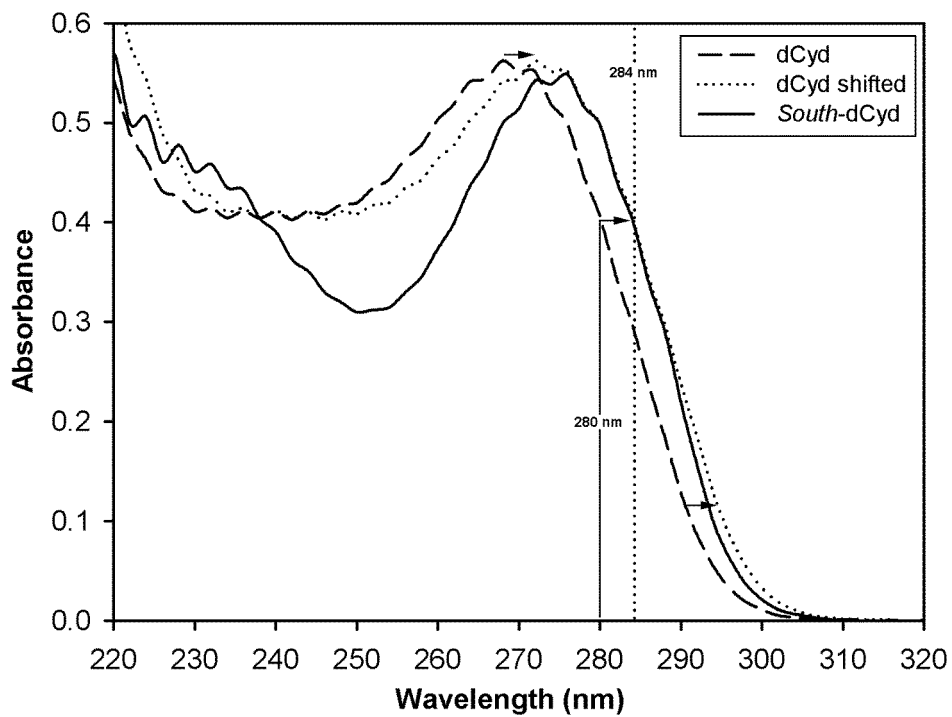

Supplement: NIHMS217050-supplement-01.pdf [file NIHMS217050-supplement-01.pdf]
